# Supplementary material for: Impact of Timanian thrust systems on the late Neoproterozoic–Phanerozoic tectonic evolution of the Barents Sea and Svalbard
Source: Copernicus journal article supplement (doi:10.5194/se-13-85-2022), 2022-01-12
Supplement: Supplementary file 1 [file se-13-85-2022-supplement.pdf]

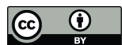

*Supplement of*

## **Impact of Timanian thrust systems on the late Neoproterozoic–Phanerozoic tectonic evolution of the Barents Sea and Svalbard**

**Jean-Baptiste P. Koehl et al.**

*Correspondence to:* Jean-Baptiste P. Koehl ([jean-baptiste.koehl@uit.no](mailto:jean-baptiste.koehl@uit.no))

The copyright of individual parts of the supplement might differ from the article licence.

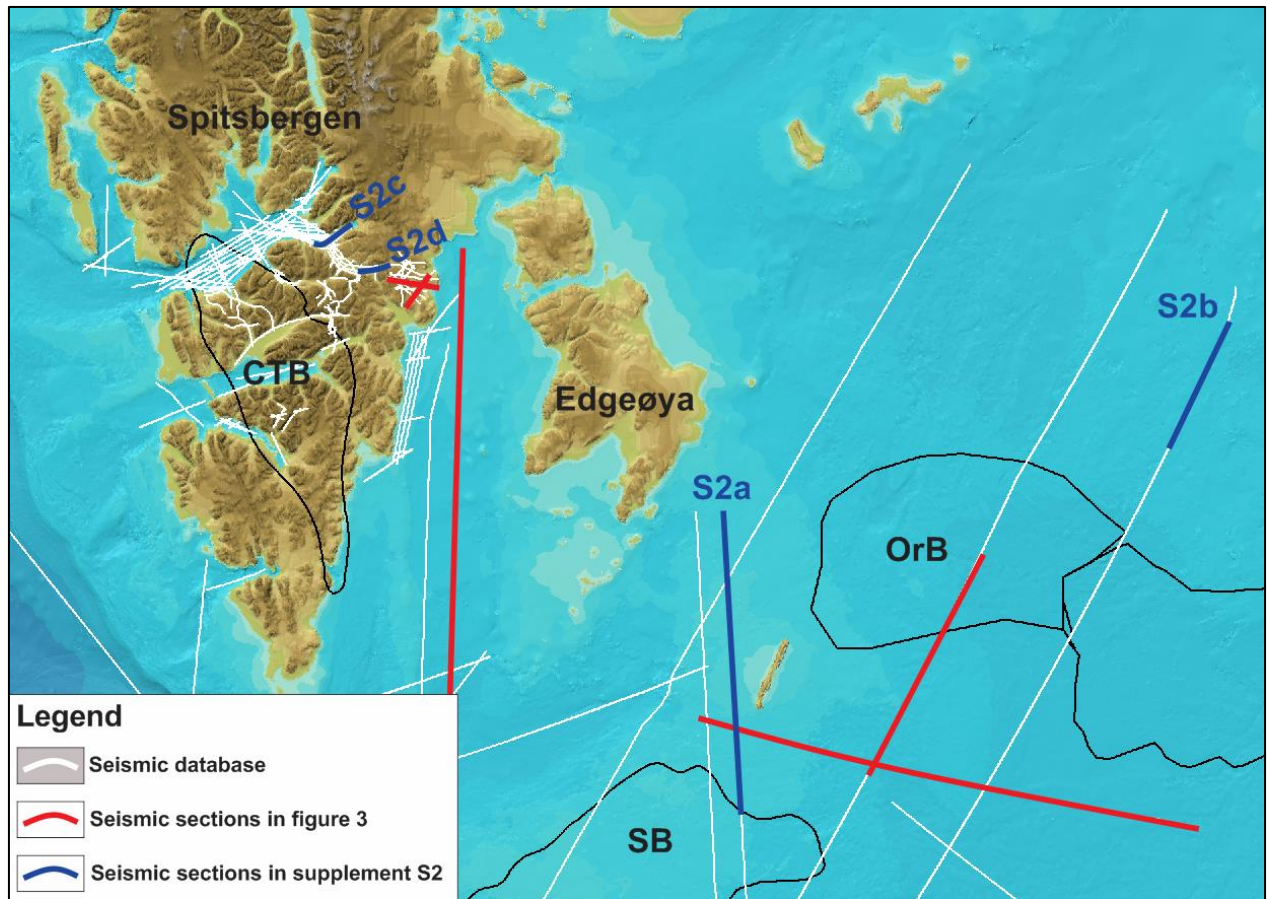

- 1
- 2 S1: Map showing the location of supplementary seismic sections displayed in supplement S2.
- 3 Topography and bathymetry are from Jakobsson et al. (2012).
- 4



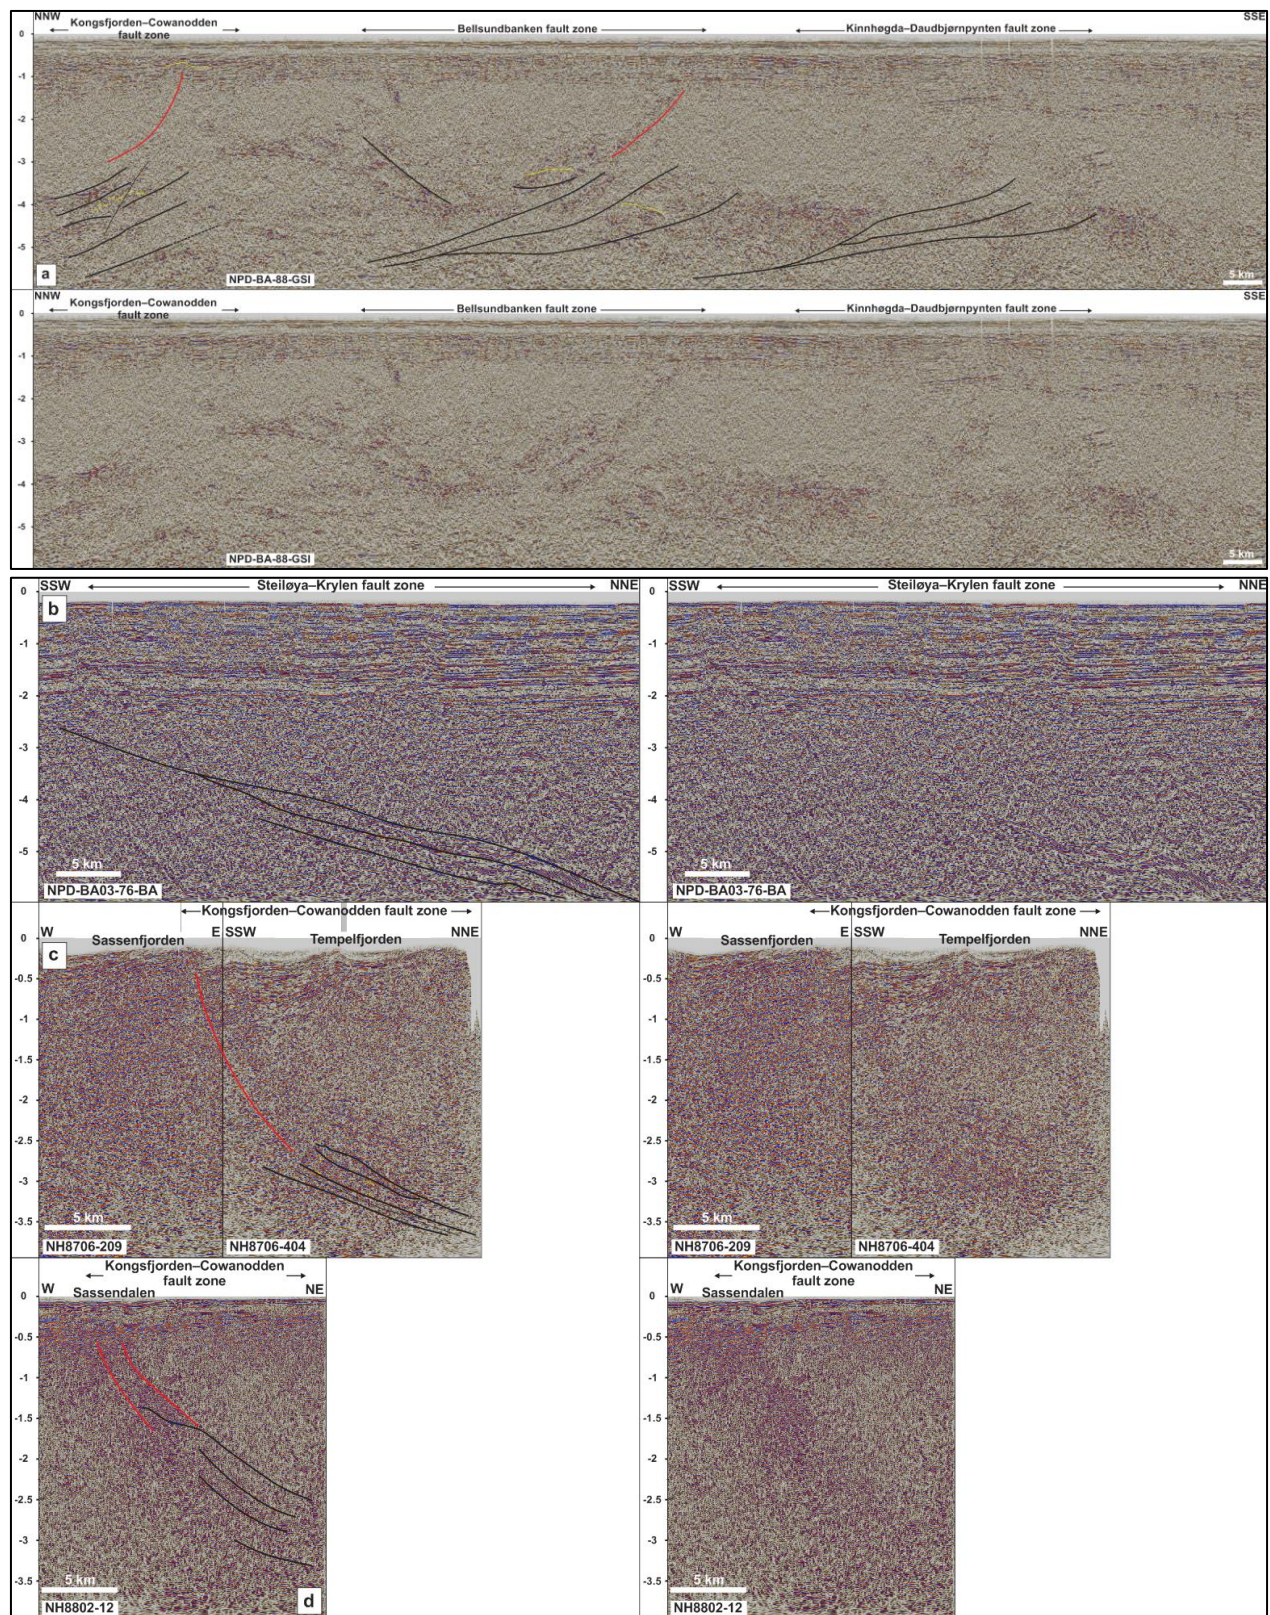

S2: Additional seismic data (a) north of the Ora and Olga basins, (b) in Sassenfjorden–Tempelfjorden, (c) in Sassendalen, and (d) between Edgeøya and Hopen showing the Steiløya–

9 Krylen fault zone (a), that the Kongsfjorden–Cowanodden fault zone extends into central  
10 Spitsbergen (b and c), and that all three major thrust systems in Storfjorden extend east-southeast  
11 of Edgeøya (d). The locations of the supplementary seismic lines shown in supplement S2 are  
12 shown in supplement S1. See legend in Fig. 3.



### Time conversions Plurdalen-1 and Raddedalen-1 wells

|     |                                            |                 |                         |  |
|-----|--------------------------------------------|-----------------|-------------------------|--|
| (a) | Average velocities (Gernigon et al., 2018) |                 | Average velocities used |  |
|     | Water                                      | 1470 m.s-1      | 1470 m.s-1              |  |
|     | Lower/Mid Triassic                         | 4000-4550 m.s-1 | 4250 m.s-1              |  |
|     | Permian                                    | 5000-5250 m.s-1 | 5000 m.s-1              |  |
|     | Pennsylvanian                              | 5500 m.s-1      | 5500 m.s-1              |  |
|     | Devonian-Mississippian                     | 5500-5800 m.s-1 | 5650 m.s-1              |  |
|     | Upper basement/Neoproterozoic              | 5900-6300 m.s-1 | 6100 m.s-1              |  |

  

|     |                     |                   |                  |                                                    |                |                    |
|-----|---------------------|-------------------|------------------|----------------------------------------------------|----------------|--------------------|
| (b) | Raddedalen-1        |                   |                  | From well completion report (Bro and Shvarts 1983) | Thickness (ms) | Thickness (ms TWT) |
|     |                     | Stratigraphy      | Averaged Top (m) | Averaged Base (m)                                  |                |                    |
|     | Permian             | 0-400/415 m       | 0                | 407,5                                              | 81,50          | 163,00             |
|     | Pennsylvanian       | 400/415-605/760 m | 407,5            | 682,5                                              | 50,00          | 100,00             |
|     | Mississippian       | 605/760-850/895 m | 682,5            | 872,5                                              | 33,63          | 67,26              |
|     | Ordovician-Silurian | 850/895-2880 m    | 872,5            | 2880                                               | 329,10         | 658,20             |

  

|     |               |              |         |                                                      |                |                    |
|-----|---------------|--------------|---------|------------------------------------------------------|----------------|--------------------|
| (c) | Plurdalen-1   |              |         | From well completion report (Harland and Kelly 1997) | Thickness (ms) | Thickness (ms TWT) |
|     |               | Stratigraphy | Top (m) | Base (m)                                             |                |                    |
|     | Triassic      | 0-128,5 m    | 0       | 128,5                                                | 30,24          | 60,47              |
|     | Permian       | 128,5-700 m  | 128,5   | 700                                                  | 114,30         | 228,60             |
|     | Pennsylvanian | 700-760,5 m  | 700     | 760,5                                                | 11,00          | 22,00              |
|     | Mississippian | 760,5-839 m  | 760,5   | 839                                                  | 13,89          | 27,79              |
|     | Devonian      | 839-2351 m   | 839     | 2351                                                 | 247,87         | 495,74             |

  

|     |                         |       |
|-----|-------------------------|-------|
| (d) | Elevation well tops (m) |       |
|     | Raddedalen-1            | 84    |
|     | Plurdalen-1             | 144,6 |

  

With removal of interval/stratigraphy above sea-level

|     |                     |                   |                  |                                                    |                |                    |               |
|-----|---------------------|-------------------|------------------|----------------------------------------------------|----------------|--------------------|---------------|
| (e) | Raddedalen-1        |                   |                  | From well completion report (Bro and Shvarts 1983) | Thickness (ms) | Thickness (ms TWT) | Depth (TWT)   |
|     |                     | Stratigraphy      | Averaged Top (m) | Averaged Base (m)                                  |                |                    |               |
|     | Permian             | 0-400/415 m       | 0                | 323,5                                              | 64,70          | 129,40             | <b>129,40</b> |
|     | Pennsylvanian       | 400/415-605/760 m | 323,5            | 598,5                                              | 50,00          | 100,00             | <b>229,40</b> |
|     | Mississippian       | 605/760-850/895 m | 598,5            | 788,5                                              | 33,63          | 67,26              | <b>296,66</b> |
|     | Ordovician-Silurian | 850/895-2880 m    | 788,5            | 2796                                               | 329,10         | 658,20             | <b>954,85</b> |

  

|     |               |              |         |                                                      |                |                    |               |
|-----|---------------|--------------|---------|------------------------------------------------------|----------------|--------------------|---------------|
| (f) | Plurdalen-1   |              |         | From well completion report (Harland and Kelly 1997) | Thickness (ms) | Thickness (ms TWT) | Depth (TWT)   |
|     |               | Stratigraphy | Top (m) | Base (m)                                             |                |                    |               |
|     | Triassic      | 0-128,5 m    | 0       | 0                                                    | 0,00           | 0,00               | <b>0,00</b>   |
|     | Permian       | 128,5-700 m  | 0       | 683,9                                                | 136,78         | 273,56             | <b>273,56</b> |
|     | Pennsylvanian | 700-760,5 m  | 683,9   | 744,4                                                | 11,00          | 22,00              | <b>295,56</b> |
|     | Mississippian | 760,5-839 m  | 744,4   | 822,9                                                | 13,89          | 27,79              | <b>323,35</b> |
|     | Devonian      | 839-2351 m   | 822,9   | 2334,9                                               | 247,87         | 495,74             | <b>819,09</b> |

  

**Depth conversion offset Agardhbukta Fault in Nordmannsfonna (fig. 3e)**

|     |                   |                    |               |
|-----|-------------------|--------------------|---------------|
| (g) | Thickness (s TWT) | Lithostratigraphy  | Thickness (m) |
|     | Offset            | 0,8 Upper basement | <b>2440</b>   |

13

14 S3: Depth and time conversion tables including (a) averages of the velocity values from Gernigon  
15 et al. (2018) used in the present study, (b–f) well data from Bro and Shvarts (1983; Raddedalen-1  
16 well) and Harland and Kelly (1997; Plurdalen-1 well) and associated time conversion for well–  
17 seismic tie, and (g) depth conversion of the offset of the Agardhbukta Fault in Nordmannsfonna,  
18 eastern Spitsbergen (see also fig. 3e in the manuscript). The averaged Tops and Base from Bro and  
19 Shvarts (1983) in (b) and (e) imply that the exact depths of the stratigraphic units is not known but  
20 correspond to depth intervals that were averaged to a single depth for simplicity. The values used  
21 for well–seismic tie are displayed in bold red in (e) and (f) (e.g., in the Raddedalen-1 well Permian  
22 was found up to a depth of 400–415, which corresponds to a TWT depth of 129.40 ms on seismic  
23 data). The red value in (g) represent the calculated top-west reverse offset of the Kongfjorden–  
24 Cowanodden fault zone by the Agardhbukta Fault in Nordmannsfonna.

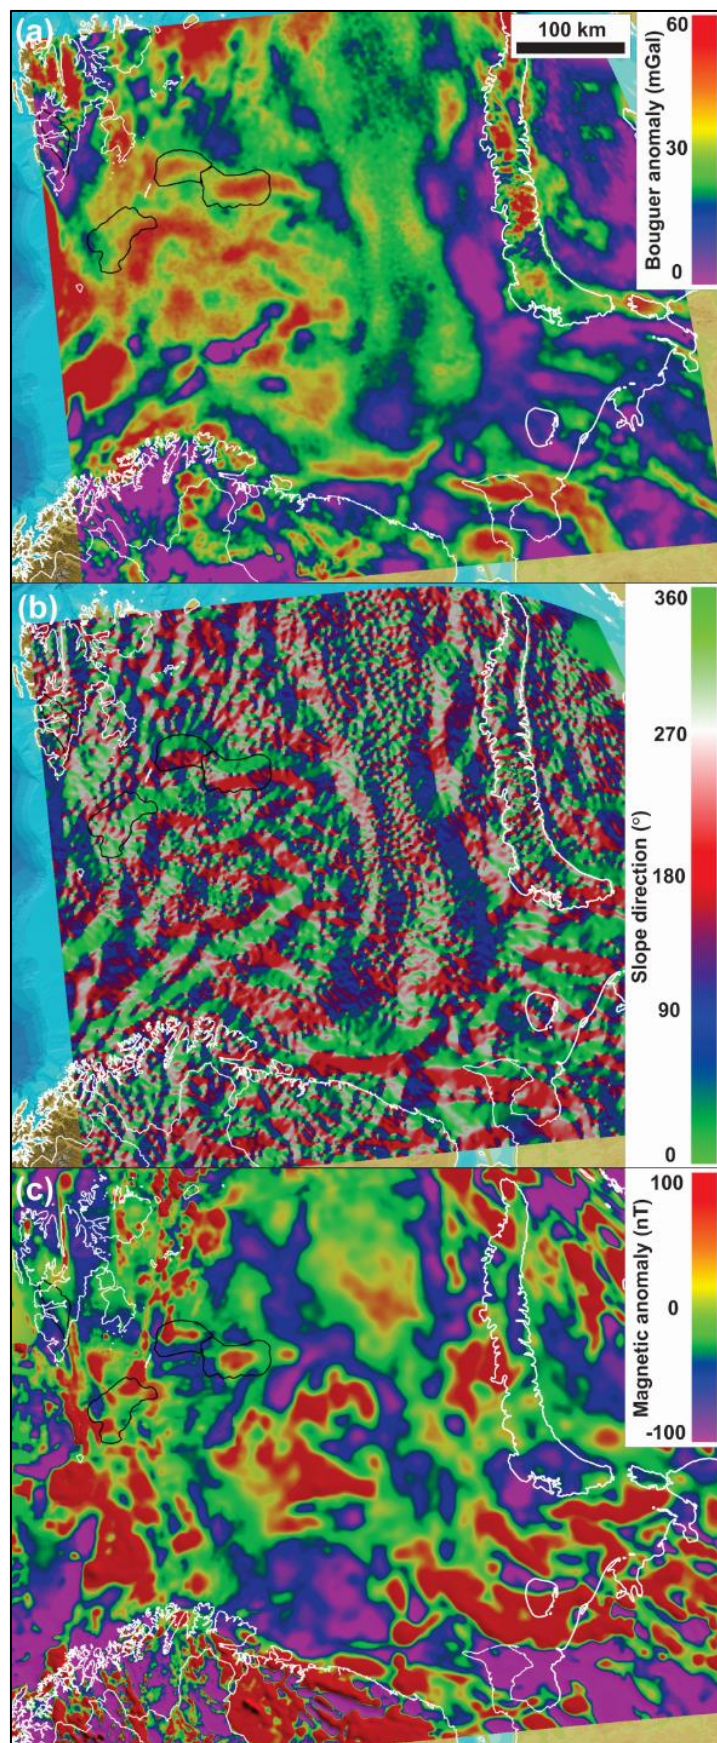

26 S4: Uninterpreted gravimetric and magnetic data.
